# Supplementary material for: Early Recurrence after Upfront Surgery for Pancreatic Ductal Adenocarcinoma
Source: MDPI journal article supplement (doi:10.3390/curroncol30040282), 2023-03-27
Supplement: s1 [file s1]

**Supplementary table S1.** Univariate and multivariate analysis of predictive factors of distant recurrence (for patients with recurrence only).

|                            | Univariate analysis     |              | Multivariate analysis |         |
|----------------------------|-------------------------|--------------|-----------------------|---------|
|                            | OR (95 IC)              | p value      | OR (95 IC)            | p value |
| Pre-op CA 19.9 > 70.5 UI/L | 0.94 (0.51-1.75)        | 0.852        |                       |         |
| Post-op CA-19.9 > 15 UI/L  | 1.26 (0.67-2.39)        | 0.472        |                       |         |
| T3-T4                      | 1.01 (0.43-2.38)        | 0.979        |                       |         |
| Nodal metastases (N+)      | 1.25 (0.57-2.77)        | 0.580        |                       |         |
| G3-G4                      | <b>2.00 (1.06-3.75)</b> | <b>0.031</b> | 1.82 (0.96-3.46)      | 0.067   |
| R1 resection               | 1.46 (0.82-2.58)        | 0.198        |                       |         |
| Lymphovascular invasion    | <b>1.86 (1.03-3.35)</b> | <b>0.039</b> | 1.70 (0.93-3.10)      | 0.083   |
| Perineural invasion        | 1.55 (0.45-5.32)        | 0.487        |                       |         |

OR: odds ratio; IC: interval confidence; BMI: body mass index; CRP: C-reactive protein; NLR: neutrophil/lymphocyte ratio; PLR: platelet/lymphocyte ratio; PD: Pancreatoduodenectomy; DP: distal pancreatectomy; TP: total pancreatectomy; POPF: post-operative pancreatic fistula.
